# Supplementary material for: Training high-strength aluminum alloys to withstand fatigue
Source: PubMed Central journal article supplement (PMC7566492; doi:10.1038/s41467-020-19071-7), 2020-10-15
Supplement: 41467_2020_19071_MOESM1_ESM.pdf [file 41467_2020_19071_MOESM1_ESM.pdf]

Supplementary Information

**Training high-strength aluminum alloys to withstand fatigue**

Qi Zhang, Yuman Zhu, Xiang Gao, Yuxiang Wu, Christopher Hutchinson\*

Department of Materials Science and Engineering, Monash University, Clayton, 3800, VIC,  
AUSTRALIA.

\*Correspondence to: [christopher.hutchinson@monash.edu](mailto:christopher.hutchinson@monash.edu)

**Table S1.** Alloys compositions and heat treatment conditions for AA2024, AA6061 and AA7050.

| Alloy  | Compositions (wt.%)                   | Solution treatment      | Aging treatment |           |
|--------|---------------------------------------|-------------------------|-----------------|-----------|
|        |                                       |                         | UA              | PA        |
| AA2024 | Al-4.6Cu-1.3Mg-(Zn-Mn-Si-Fe-Cr-Ti)    | 493°C 1h, air quenching | 191°C 30min     | 191°C 7h  |
| AA6061 | Al-1Mg-0.67Si-(Cu- Zn-Mn-Fe-Cr-Ti)    | 530°C 1h, air quenching | 177°C 20min     | 177°C 20h |
| AA7050 | Al-2.2Cu-2.3Mg-6.2Zn-(Mn-Si-Fe-Cr-Ti) | 480°C 1h, air quenching | 150°C 10min     | 150°C 10h |

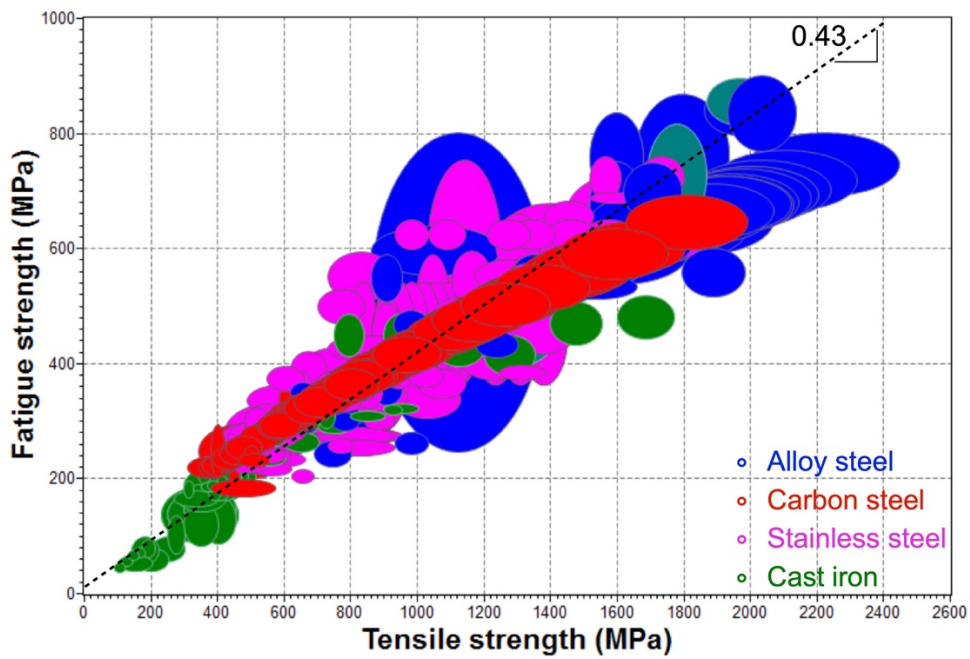

**Fig. S1.** Fatigue strength versus tensile strength for alloy steel, carbon steel, stainless steel and cast iron <sup>10</sup>.

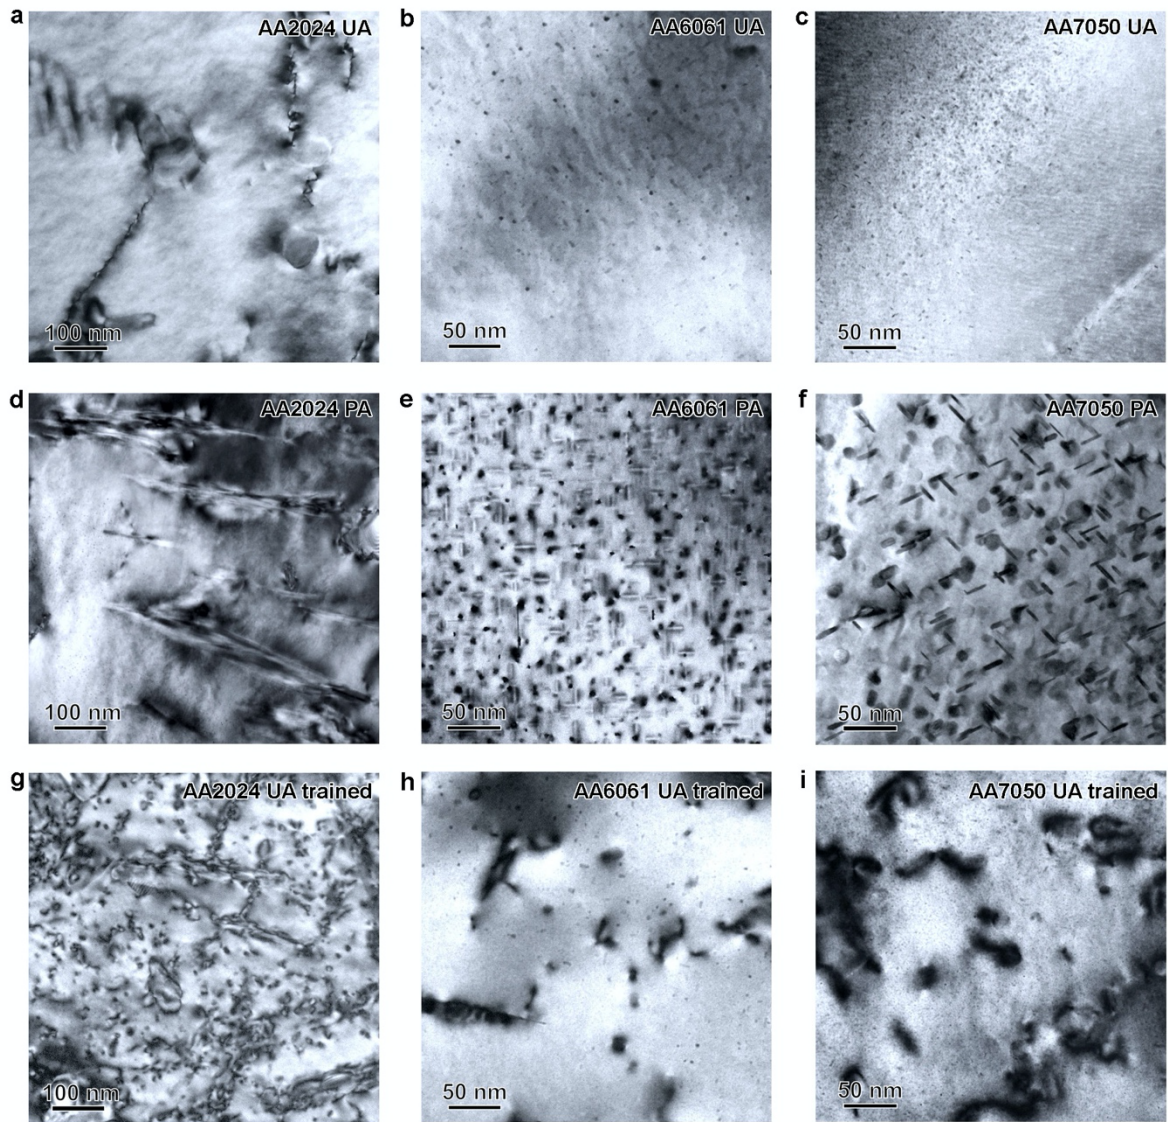

**Fig. S2.** Bright field TEM images showing initial precipitation microstructure in grains for the under aged (UA) AA2024 (a), AA6061 (b) and AA7050 (c), the peak aged (PA) AA2024 (d), AA6061 (e) and AA7050 (f), and the cyclically trained UA AA2024 (g), AA6061 (h) and AA7050 (i) alloys. The electron beam is closely parallel to  $\langle 001 \rangle_{Al}$  for AA2024 and AA6061, and is closely parallel to  $\langle 110 \rangle_{Al}$  for AA7050.

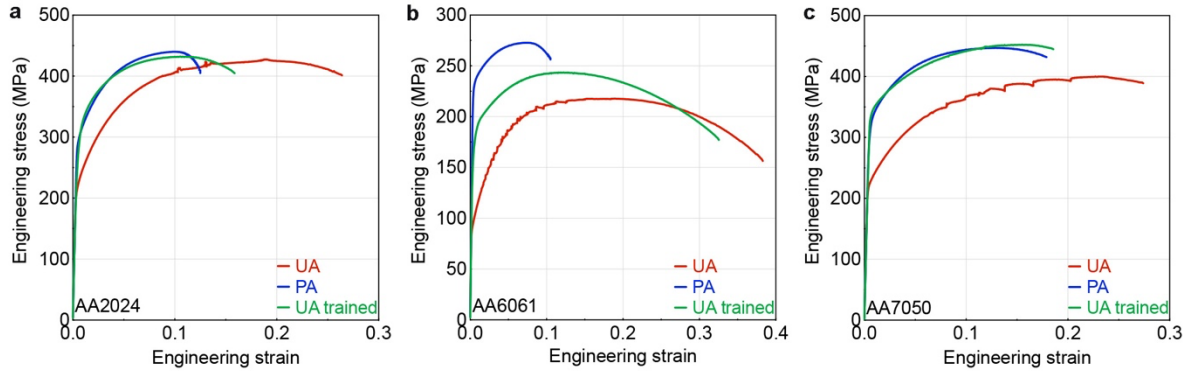

**Fig. S3.** Engineering stress strain curves for UA, PA and trained AA2024 (a), AA6061 (b) and AA7050 (c) alloys.

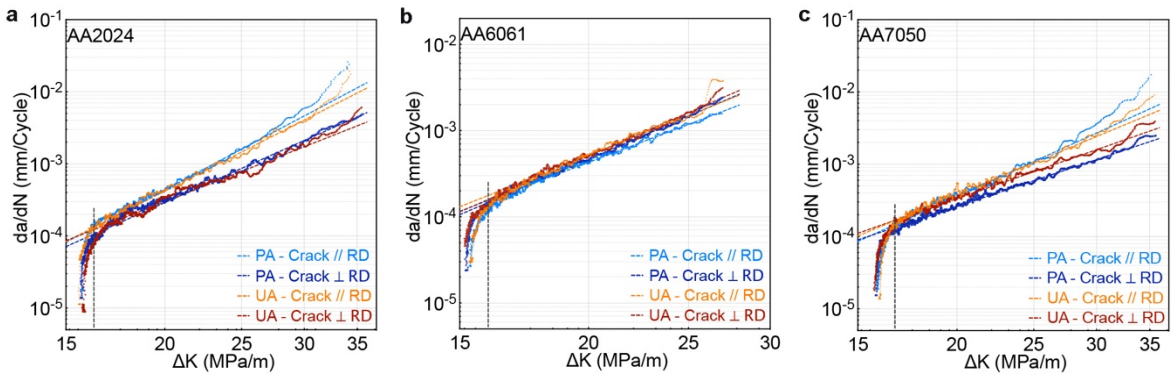

**Fig. S4.** The fatigue crack growth (FCG)  $da/dN$ - $\Delta K$  curves in log scale for PA and UA AA2024 (a), AA6061 (b) and AA7050 (c) alloys. Tests were performed with pre-cracks both parallel (//) and perpendicular ( $\perp$ ) to the rolling direction (RD).

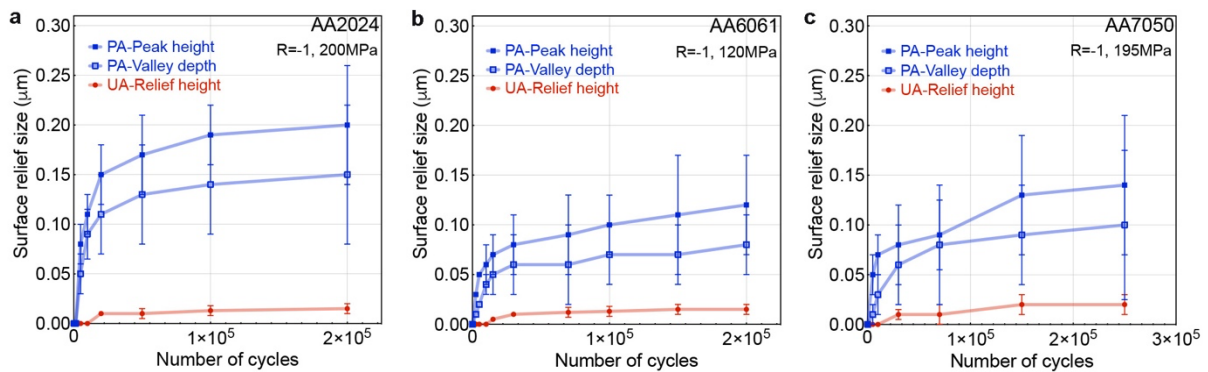

**Fig. S5.** Summary of the surface relief size evolution for UA and PA samples during fatigue. The stress amplitudes applied are 200 MPa for AA2024 (a), 120 MPa for AA6061 (b) and 195 MPa for AA7050 (c).

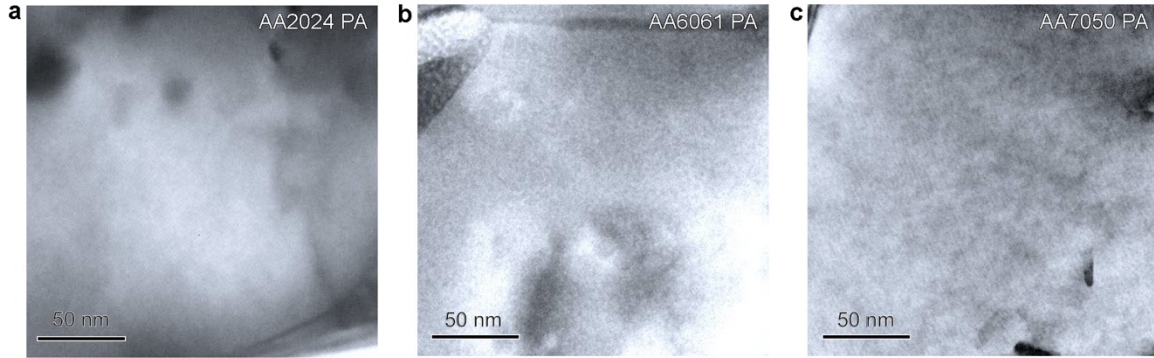

**Fig. S6.** Bright field TEM images showing the microstructure in PFZ's for PA and HCF treated AA2024 (a), AA6061 (b) and AA7050 (c) alloys. The electron beam is closely parallel to  $\langle 001 \rangle_{Al}$  for AA2024 and AA6061, and is closely parallel to  $\langle 110 \rangle_{Al}$  for AA7050. AA2024 was fatigued at 185 MPa for  $1 \times 10^6$  cycles, AA6061 was fatigued at 120 MPa for  $2 \times 10^6$  cycles and AA7050 was fatigued at 175 MPa for  $2 \times 10^6$  cycles.

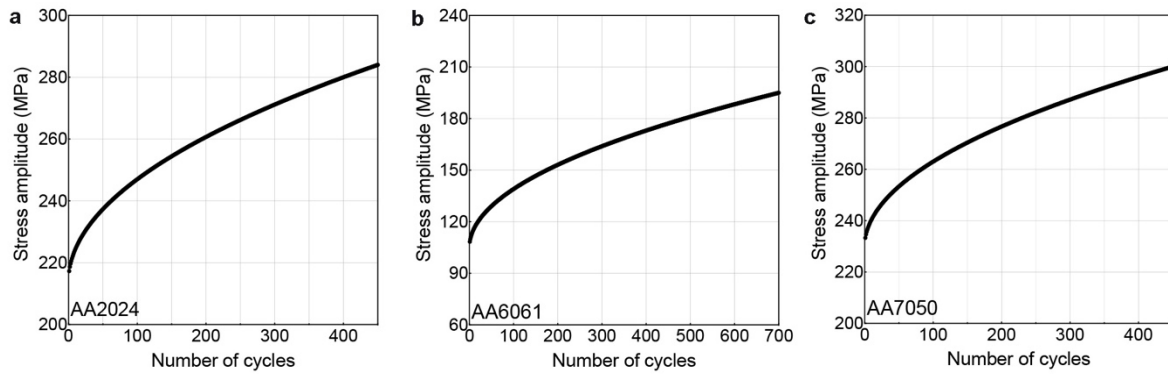

**Fig. S7.** Cyclic training profiles showing the stress amplitude evolution as a function of cycle number for UA AA2024 (a), AA6061 (b) and AA7050 (c) alloys.

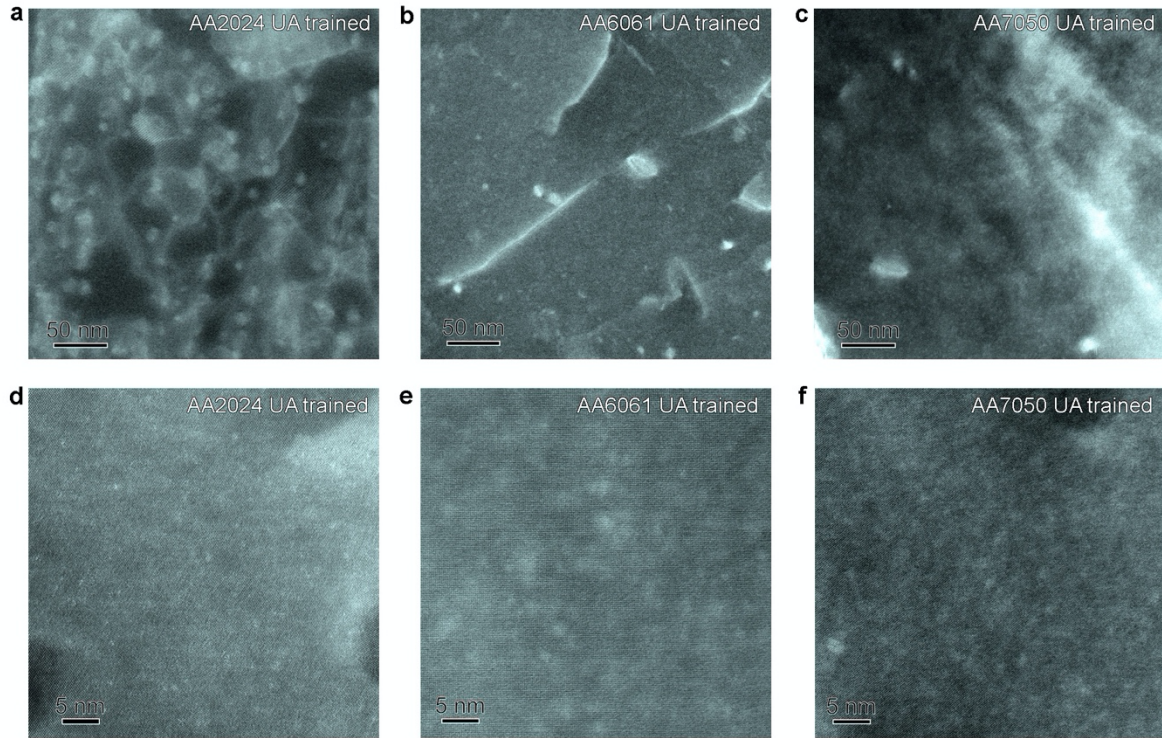

**Fig. S8.** LAADF-STEM images showing the precipitation microstructure in grains for the cyclically trained UA AA2024 (a, d), AA6061 (b, e) and AA7050 (c, f) alloys. The electron beam direction was parallel to  $\langle 100 \rangle_{Al}$  for AA2024 and AA6061 and parallel to  $\langle 110 \rangle_{Al}$  for 7050.

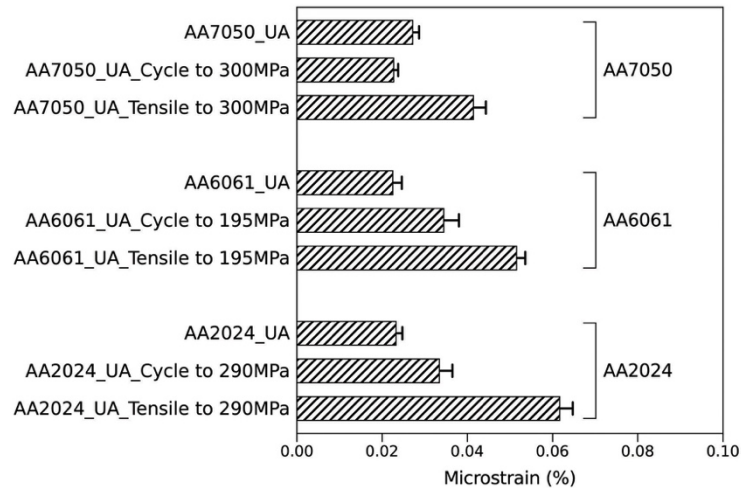

**Fig. S9.** Comparisons between the microstrains in original UA samples, samples after cyclical training and samples after tensile to the same final training stress ( $\sigma_f$ ) for AA2024, AA6061 and AA7050 alloys.
